# Supplementary material for: Governance is key to controlling SARS-CoV-2’s vaccine resistance
Source: bioRxiv or medRxiv preprint supplement (doi:10.1101/2022.05.26.22275649), 2022-05-30
Supplement: Supplementary file [file media-1.pdf]

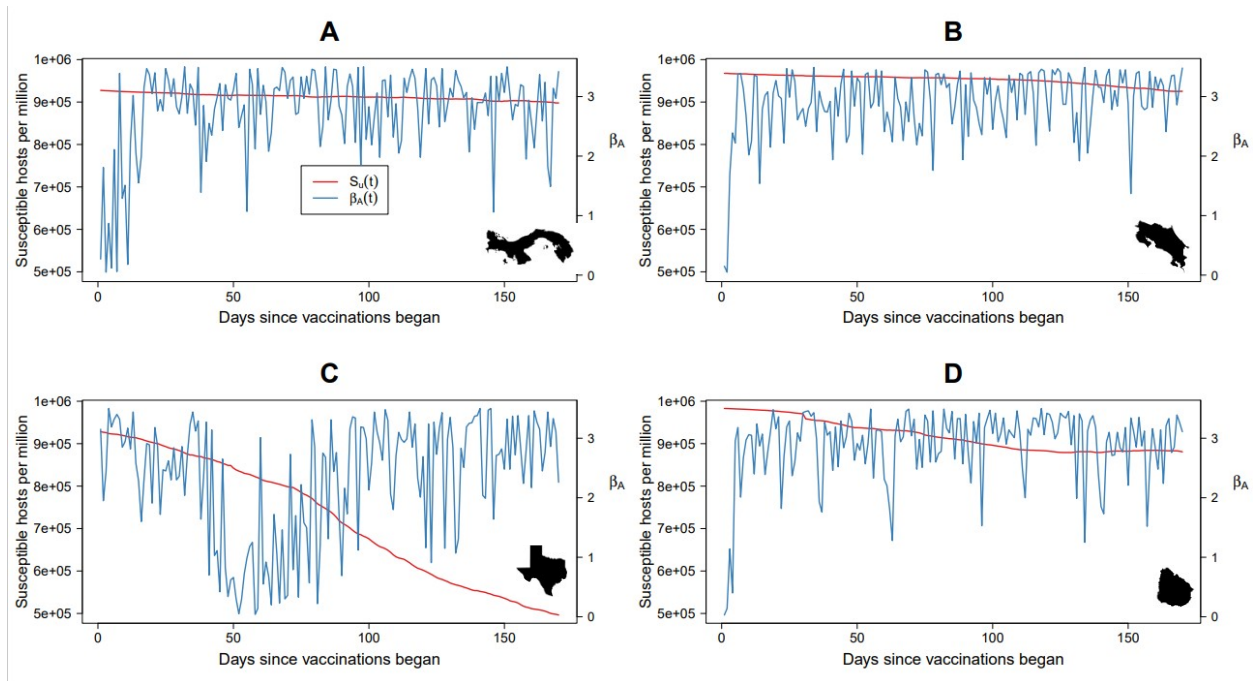

**Fig. S1.** Susceptible hosts per million (red lines) and the estimated daily infection coefficient  $\beta_A(t)$  (blue lines) of the ancestral strain A estimated from the Ensemble Kalman Filter routine

5 described in the Supplementary Methods for the four territories. The time horizon is as in Figure 1 of the main text: (A) Panama, (B) Costa Rica, (C) Texas and (D) Uruguay.
